# Supplementary material for: Vertical Profiles of PM2.5 and O3 Measured Using an Unmanned Aerial Vehicle (UAV) and Their Relationships with Synoptic- and Local-Scale Air Movements
Source: MDPI journal article supplement (doi:10.3390/rs16091581), 2024-04-29
Supplement: s1 [file s1]

# **Vertical profiles of PM<sub>2.5</sub> and O<sub>3</sub> measured using unmanned aerial vehicle (UAV) and their relationships with synoptic- and local-scale air movement**

Hyemin Hwang<sup>1</sup>, Ju Eun Lee<sup>2</sup>, Seung A Shin<sup>2</sup>, Chae Rim You<sup>2</sup>, Su Hyun Shin<sup>3</sup>, Jong-Sung Park<sup>3</sup>, Jae Young Lee<sup>2\*</sup>

<sup>1</sup> Department of Environmental Engineering, Ajou University, Suwon, 16499, South Korea

<sup>2</sup> Department of Environmental and Safety Engineering, Ajou University, Suwon, 16499, South Korea

<sup>3</sup> Climate & Air Quality Research Department, National Institute of Environmental Research, Incheon 22689, South Korea

\*Corresponding Author: Jae Young Lee, [jaeylee@ajou.ac.kr](mailto:jaeylee@ajou.ac.kr)

Table S1. Statistical description of the meteorological and environmental conditions measured at Gyeonggi Air Quality Management Office in 2023.

| Category             | Factor                                 | Mean  | Std. Dev. | Q1    | Q2    | Q3    |
|----------------------|----------------------------------------|-------|-----------|-------|-------|-------|
| January–<br>March    | Temperature [°C]                       | 3.1   | 6.6       | -1.4  | 2.9   | 7.0   |
|                      | Relative Humidity [%]                  | 60.4  | 19.1      | 46.2  | 59.7  | 75.0  |
|                      | Wind Speed [m/s]                       | 0.8   | 0.7       | 0.3   | 0.5   | 1.1   |
|                      | PM <sub>2.5</sub> [µg/m <sup>3</sup> ] | 39.5  | 26.0      | 20.0  | 32.0  | 53.0  |
|                      | O <sub>3</sub> [ppm]                   | 0.022 | 0.018     | 0.004 | 0.021 | 0.034 |
| April–<br>June       | Temperature [°C]                       | 18.7  | 5.8       | 14.4  | 19.3  | 23.0  |
|                      | Relative Humidity [%]                  | 65.0  | 21.7      | 48.5  | 66.9  | 84.5  |
|                      | Wind Speed [m/s]                       | 0.8   | 0.6       | 0.4   | 0.6   | 1.0   |
|                      | PM <sub>2.5</sub> [µg/m <sup>3</sup> ] | 26.6  | 15.5      | 17.0  | 24.0  | 34.0  |
|                      | O <sub>3</sub> [ppm]                   | 0.037 | 0.019     | 0.023 | 0.038 | 0.050 |
| July–<br>September   | Temperature [°C]                       | 26.4  | 3.7       | 24.0  | 26.1  | 28.8  |
|                      | Relative Humidity [%]                  | 76.0  | 15.1      | 64.4  | 78.5  | 89.7  |
|                      | Wind Speed [m/s]                       | 0.7   | 0.5       | 0.4   | 0.5   | 0.8   |
|                      | PM <sub>2.5</sub> [µg/m <sup>3</sup> ] | 14.6  | 9.4       | 8.0   | 14.0  | 20.0  |
|                      | O <sub>3</sub> [ppm]                   | 0.030 | 0.022     | 0.014 | 0.026 | 0.043 |
| October–<br>December | Temperature [°C]                       | 8.1   | 8.7       | 1.5   | 8.6   | 15.6  |
|                      | Relative Humidity [%]                  | 69.5  | 16.9      | 57.2  | 69.0  | 84.6  |
|                      | Wind Speed [m/s]                       | 0.9   | 0.8       | 0.3   | 0.5   | 1.1   |
|                      | PM <sub>2.5</sub> [µg/m <sup>3</sup> ] | 22.9  | 16.4      | 11.0  | 19.0  | 29.0  |
|                      | O <sub>3</sub> [ppm]                   | 0.022 | 0.017     | 0.006 | 0.022 | 0.033 |
| 6 am                 | Temperature [°C]                       | 11.2  | 10.8      | 1.9   | 12.4  | 20.5  |
|                      | Relative Humidity [%]                  | 79.3  | 15.0      | 69.7  | 84.0  | 92.1  |
|                      | Wind Speed [m/s]                       | 0.5   | 0.4       | 0.2   | 0.4   | 0.5   |
|                      | PM <sub>2.5</sub> [µg/m <sup>3</sup> ] | 26.8  | 19.6      | 13.0  | 23.0  | 36.0  |
|                      | O <sub>3</sub> [ppm]                   | 0.015 | 0.014     | 0.002 | 0.012 | 0.026 |
| 12 pm                | Temperature [°C]                       | 16.3  | 11.3      | 6.5   | 18.5  | 25.4  |
|                      | Relative Humidity [%]                  | 57.6  | 19.3      | 44.2  | 56.1  | 69.4  |
|                      | Wind Speed [m/s]                       | 1.0   | 0.6       | 0.6   | 0.7   | 1.1   |
|                      | PM <sub>2.5</sub> [µg/m <sup>3</sup> ] | 26.4  | 18.9      | 14.0  | 22.0  | 34.0  |
|                      | O <sub>3</sub> [ppm]                   | 0.035 | 0.017     | 0.023 | 0.033 | 0.045 |
| 6 pm                 | Temperature [°C]                       | 16.3  | 10.9      | 6.8   | 18.4  | 25.0  |
|                      | Relative Humidity [%]                  | 59.4  | 18.1      | 46.5  | 58.4  | 70.5  |
|                      | Wind Speed [m/s]                       | 1.1   | 0.7       | 0.5   | 1.0   | 1.5   |
|                      | PM <sub>2.5</sub> [µg/m <sup>3</sup> ] | 24.1  | 20.2      | 11.0  | 19.0  | 29.5  |
|                      | O <sub>3</sub> [ppm]                   | 0.040 | 0.019     | 0.026 | 0.040 | 0.054 |
| 12 am                | Temperature [°C]                       | 12.8  | 10.6      | 4.1   | 13.8  | 21.8  |
|                      | Relative Humidity [%]                  | 74.0  | 15.8      | 63.4  | 77.0  | 87.0  |
|                      | Wind Speed [m/s]                       | 0.5   | 0.6       | 0.2   | 0.4   | 0.6   |
|                      | PM <sub>2.5</sub> [µg/m <sup>3</sup> ] | 26.9  | 20.1      | 14.0  | 23.0  | 33.0  |
|                      | O <sub>3</sub> [ppm]                   | 0.022 | 0.017     | 0.005 | 0.021 | 0.034 |

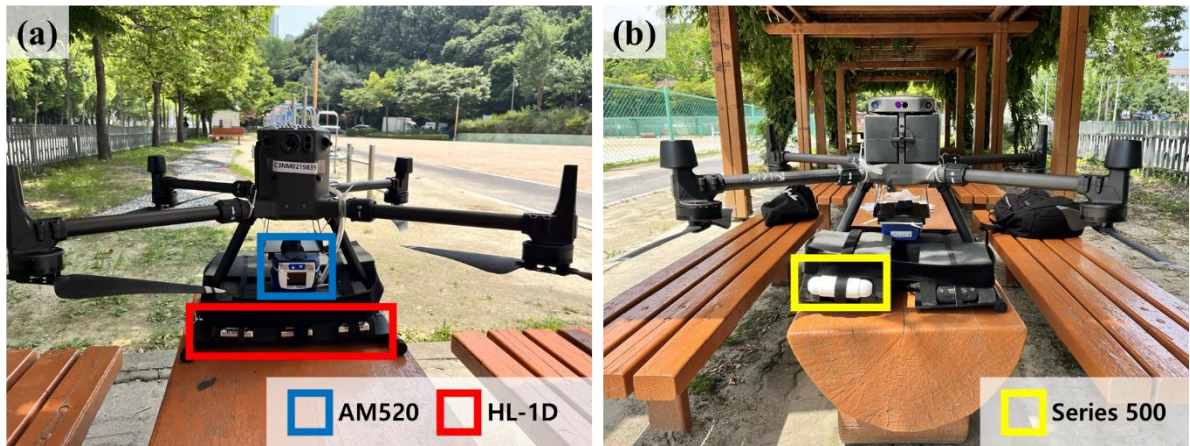

Figure S1. Matrice 300 RTK (DJI, China) equipped the (a) AM520 (TSI, USA), HL-1D (Rotronic, Switzerland), and (b) Series 500 (Aeroqual, New Zealand).

Table S2. Flight and measurement information. O indicates the successful measurement.

| Date         | Time  | PM <sub>2.5</sub> | O <sub>3</sub> | Temperature | Humidity |
|--------------|-------|-------------------|----------------|-------------|----------|
| 2023-08-01   | 10:00 | O                 | O              | O           | O        |
| 2023-08-17   | 12:00 | O                 | O              | O           | O        |
| 2023-08-25   | 7:00  | O                 | -              | O           | O        |
| 2023-08-25   | 10:00 | O                 | O              | O           | O        |
| 2023-08-25   | 12:00 | O                 | O              | O           | O        |
| 2023-08-25   | 14:00 | O                 | -              | O           | O        |
| 2023-08-25   | 18:00 | O                 | O              | O           | O        |
| 2023-08-26   | 7:00  | O                 | O              | O           | O        |
| 2023-08-26   | 10:00 | O                 | O              | O           | O        |
| 2023-08-26   | 12:00 | O                 | O              | O           | O        |
| 2023-08-26   | 14:00 | O                 | O              | O           | O        |
| 2023-08-26   | 18:00 | O                 | O              | O           | O        |
| 2023-08-27   | 7:00  | -                 | -              | O           | O        |
| 2023-08-27   | 10:00 | -                 | O              | O           | O        |
| 2023-08-27   | 12:00 | -                 | O              | O           | O        |
| 2023-08-27   | 14:00 | -                 | O              | O           | O        |
| 2023-08-27   | 18:00 | -                 | O              | O           | O        |
| 2023-08-31   | 7:00  | O                 | -              | O           | O        |
| 2023-08-31   | 10:00 | O                 | O              | O           | O        |
| 2023-08-31   | 12:00 | O                 | -              | O           | O        |
| 2023-08-31   | 14:00 | O                 | O              | O           | O        |
| 2023-08-31   | 18:00 | O                 | O              | O           | O        |
| 2023-09-01   | 7:00  | -                 | -              | O           | O        |
| 2023-09-01   | 10:00 | -                 | O              | O           | O        |
| 2023-09-01   | 12:00 | O                 | O              | O           | O        |
| 2023-09-01   | 14:00 | O                 | O              | O           | O        |
| 2023-09-01   | 18:00 | O                 | O              | O           | O        |
| 2023-09-23   | 7:00  | O                 | -              | O           | O        |
| 2023-09-23   | 10:00 | O                 | O              | O           | O        |
| 2023-09-23   | 12:00 | O                 | -              | O           | O        |
| 2023-09-23   | 14:00 | O                 | O              | O           | O        |
| 2023-09-23   | 18:00 | O                 | O              | O           | O        |
| <b>Total</b> |       | 25                | 24             | 32          | 32       |

Table S3. Coefficients and performance of correction models.

| Pollutant         | Formulas                                              | Coefficients |        | R <sup>2</sup> |
|-------------------|-------------------------------------------------------|--------------|--------|----------------|
|                   |                                                       | UAV          | RH     |                |
| PM <sub>2.5</sub> | PM <sub>2.5</sub> (AQMO) ~ PM <sub>2.5</sub> (UAV)+RH | 0.501*       | 0.036* | 0.981          |
| O <sub>3</sub>    | O <sub>3</sub> (AQMO) ~ O <sub>3</sub> (UAV)          | 0.632*       | -      | 0.968          |

\* p-value < 0.05

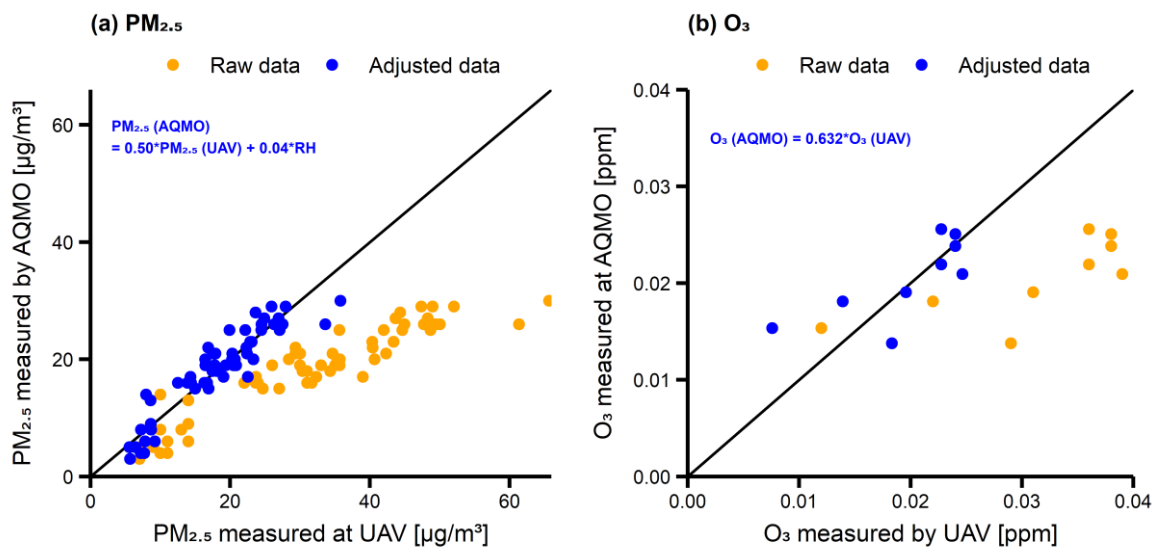

Figure S2. Comparison between Gyeonggi Air Quality Management Office data and UAV measurement data. Orange dots show uncorrected measurement results, and blue dots show the measurement results corrected based on the model shown in Table S3.

Table S4. Summary of PM<sub>2.5</sub> and O<sub>3</sub> concentration, temperature, and relative humidity by altitude.

| Altitude (m)       | PM <sub>2.5</sub> (µg/m <sup>3</sup> ) | O <sub>3</sub> (ppm) | Temperature (°C) | Humidity (%) |
|--------------------|----------------------------------------|----------------------|------------------|--------------|
| 30                 | 16.2                                   | 0.026                | 26.9             | 63.7         |
| 60                 | 16.3                                   | 0.029                | 26.5             | 63.3         |
| 90                 | 16.4                                   | 0.032                | 26.3             | 63.5         |
| 120                | 16.6                                   | 0.033                | 26.0             | 64.4         |
| 145                | 16.9                                   | 0.034                | 25.8             | 64.9         |
| Average            | 16.5                                   | 0.031                | 26.3             | 63.9         |
| Standard deviation | 0.3                                    | 0.003                | 0.4              | 0.7          |

Table S5. Summary of PM<sub>2.5</sub> concentrations by altitude over time.

| Altitude (m)       | PM <sub>2.5</sub> (µg/m <sup>3</sup> ) |       |       |       |       |
|--------------------|----------------------------------------|-------|-------|-------|-------|
|                    | 7:00                                   | 10:00 | 12:00 | 14:00 | 18:00 |
| 30                 | 29.9                                   | 16.4  | 13.5  | 13.5  | 11.2  |
| 60                 | 29.8                                   | 16.8  | 13.6  | 14.0  | 11.0  |
| 90                 | 30.1                                   | 16.9  | 14.0  | 13.9  | 10.9  |
| 120                | 30.8                                   | 17.3  | 14.3  | 14.9  | 10.9  |
| 145                | 31.1                                   | 17.6  | 14.8  | 14.6  | 11.1  |
| Average            | 30.4                                   | 17.0  | 14.0  | 14.2  | 11.0  |
| Standard deviation | 0.6                                    | 0.5   | 0.5   | 0.5   | 0.1   |



Table S6. Summary of O<sub>3</sub> concentrations by altitude over time.

| Altitude (m)       | O <sub>3</sub> (ppm) |       |       |       |       |
|--------------------|----------------------|-------|-------|-------|-------|
|                    | 7:00                 | 10:00 | 12:00 | 14:00 | 18:00 |
| 30                 | 0.010                | 0.012 | 0.036 | 0.037 | 0.025 |
| 60                 | 0.008                | 0.020 | 0.032 | 0.044 | 0.029 |
| 90                 | 0.015                | 0.020 | 0.039 | 0.042 | 0.034 |
| 120                | 0.013                | 0.022 | 0.038 | 0.047 | 0.033 |
| 145                | 0.012                | 0.022 | 0.039 | 0.051 | 0.032 |
| Average            | 0.012                | 0.019 | 0.037 | 0.044 | 0.031 |
| Standard deviation | 0.003                | 0.004 | 0.003 | 0.005 | 0.004 |

Table S7. Summary of temperature by altitude over time.

| Altitude (m)       | Temperature (°C) |       |       |       |       |
|--------------------|------------------|-------|-------|-------|-------|
|                    | 7:00             | 10:00 | 12:00 | 14:00 | 18:00 |
| 30                 | 22.5             | 27.3  | 28.7  | 29.1  | 26.6  |
| 60                 | 22.4             | 26.8  | 28.1  | 28.2  | 27.0  |
| 90                 | 22.3             | 26.5  | 27.8  | 27.8  | 27.1  |
| 120                | 22.2             | 26.2  | 27.4  | 27.5  | 26.9  |
| 145                | 22.1             | 26.1  | 26.9  | 27.3  | 26.6  |
| Average            | 22.3             | 26.6  | 27.8  | 28.0  | 26.8  |
| Standard deviation | 0.2              | 0.5   | 0.7   | 0.7   | 0.2   |

Table S8. Summary of humidity by altitude over time.

| Altitude (m)       | Humidity (%) |       |       |       |       |
|--------------------|--------------|-------|-------|-------|-------|
|                    | 7:00         | 10:00 | 12:00 | 14:00 | 18:00 |
| 30                 | 86.7         | 63.9  | 54.3  | 52.2  | 62.8  |
| 60                 | 86.0         | 64.9  | 55.2  | 52.8  | 58.6  |
| 90                 | 85.8         | 65.2  | 56.1  | 53.7  | 57.8  |
| 120                | 85.9         | 66.3  | 57.2  | 53.9  | 58.2  |
| 145                | 85.8         | 66.4  | 58.3  | 54.4  | 59.0  |
| Average            | 86.0         | 65.3  | 56.2  | 53.4  | 59.3  |
| Standard deviation | 0.4          | 1.0   | 1.6   | 0.9   | 2.0   |

Table S9. Classification result of 32 trajectories.

| <b>Date</b> | <b>Time</b> | <b>Cluster Index</b> |
|-------------|-------------|----------------------|
| 2023-08-01  | 10:00       | Cluster 3            |
| 2023-08-17  | 12:00       | Cluster 2            |
| 2023-08-25  | 7:00        | Cluster 5            |
| 2023-08-25  | 10:00       | Cluster 5            |
| 2023-08-25  | 12:00       | Cluster 5            |
| 2023-08-25  | 14:00       | Cluster 5            |
| 2023-08-25  | 18:00       | Cluster 5            |
| 2023-08-26  | 7:00        | Cluster 1            |
| 2023-08-26  | 10:00       | Cluster 1            |
| 2023-08-26  | 12:00       | Cluster 1            |
| 2023-08-26  | 14:00       | Cluster 1            |
| 2023-08-26  | 18:00       | Cluster 1            |
| 2023-08-27  | 7:00        | Cluster 2            |
| 2023-08-27  | 10:00       | Cluster 2            |
| 2023-08-27  | 12:00       | Cluster 2            |
| 2023-08-27  | 14:00       | Cluster 2            |
| 2023-08-27  | 18:00       | Cluster 2            |
| 2023-08-31  | 7:00        | Cluster 1            |
| 2023-08-31  | 10:00       | Cluster 1            |
| 2023-08-31  | 12:00       | Cluster 1            |
| 2023-08-31  | 14:00       | Cluster 1            |
| 2023-08-31  | 18:00       | Cluster 1            |
| 2023-09-01  | 7:00        | Cluster 1            |
| 2023-09-01  | 10:00       | Cluster 1            |
| 2023-09-01  | 12:00       | Cluster 1            |
| 2023-09-01  | 14:00       | Cluster 1            |
| 2023-09-01  | 18:00       | Cluster 1            |
| 2023-09-23  | 7:00        | Cluster 3            |
| 2023-09-23  | 10:00       | Cluster 3            |
| 2023-09-23  | 12:00       | Cluster 3            |
| 2023-09-23  | 14:00       | Cluster 3            |
| 2023-09-23  | 18:00       | Cluster 4            |

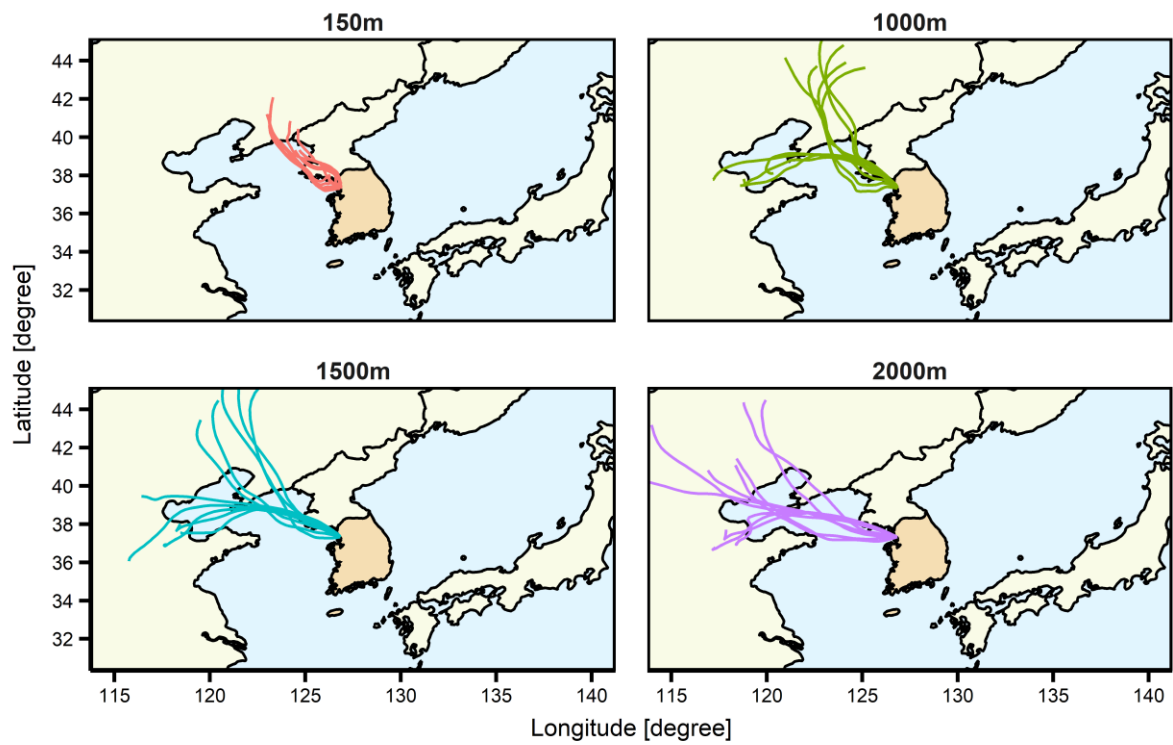

Figure S3. Backward air trajectories for Cluster 1 estimated at the arriving altitudes of 150m, 1000m, 1500m, and 2000m.

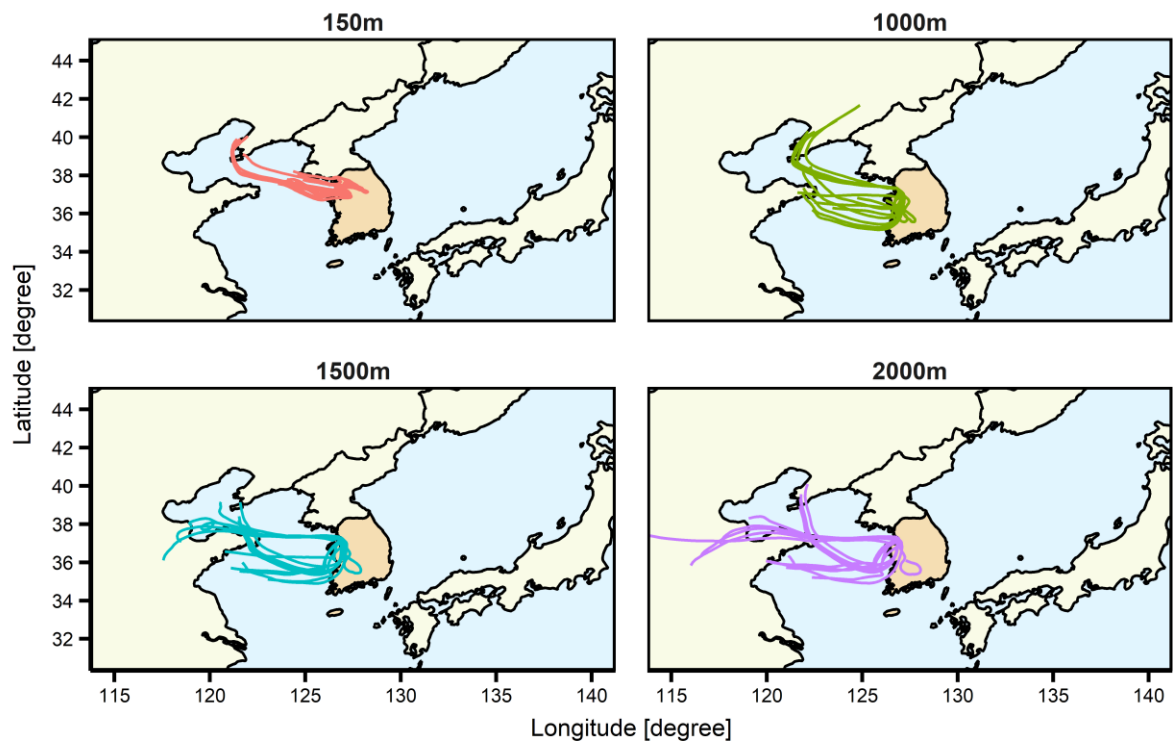

Figure S4. Backward air trajectories for Cluster 2 estimated at the arriving altitudes of 150m, 1000m, 1500m, and 2000m.

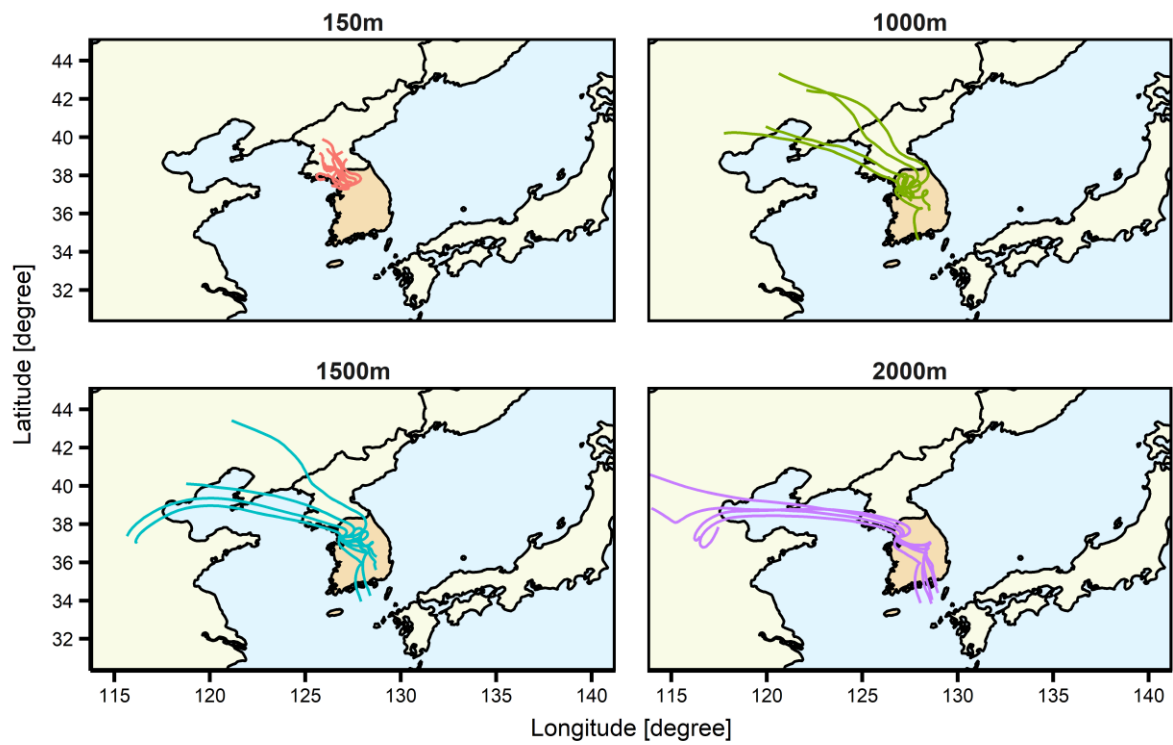

Figure S5. Backward air trajectories for Cluster 3 estimated at the arriving altitudes of 150m, 1000m, 1500m, and 2000m.

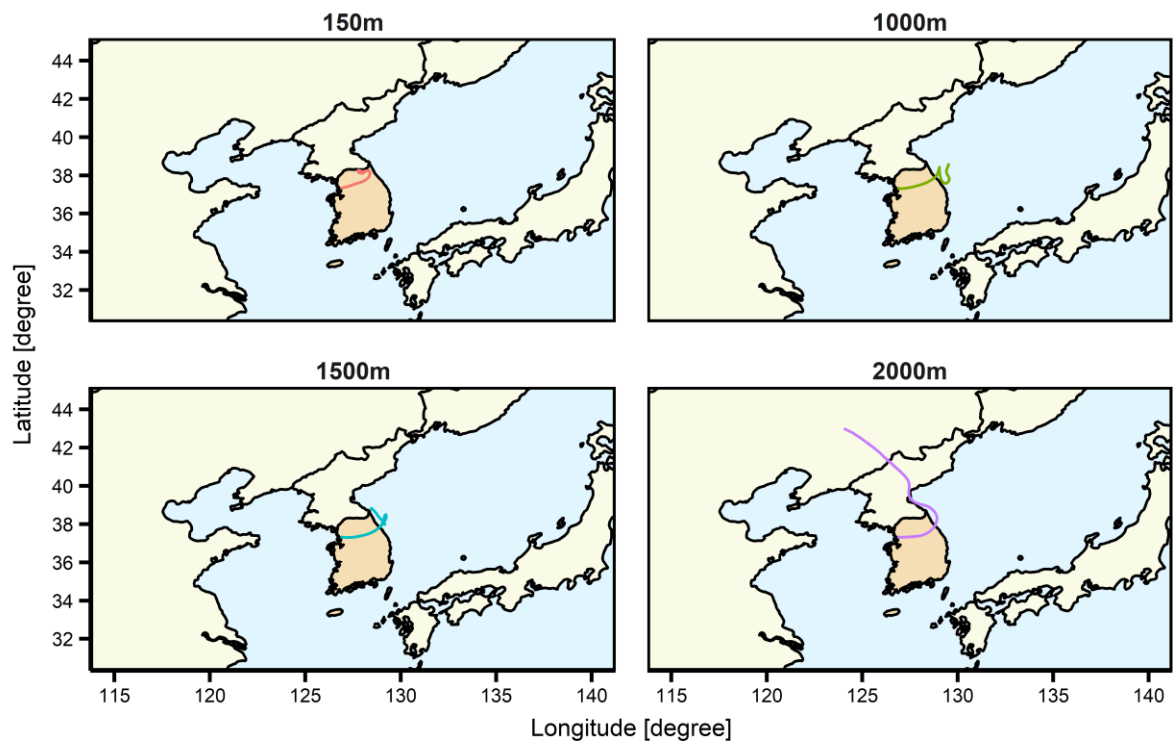

Figure S6. Backward air trajectories for Cluster 4 estimated at the arriving altitudes of 150m, 1000m, 1500m, and 2000m.



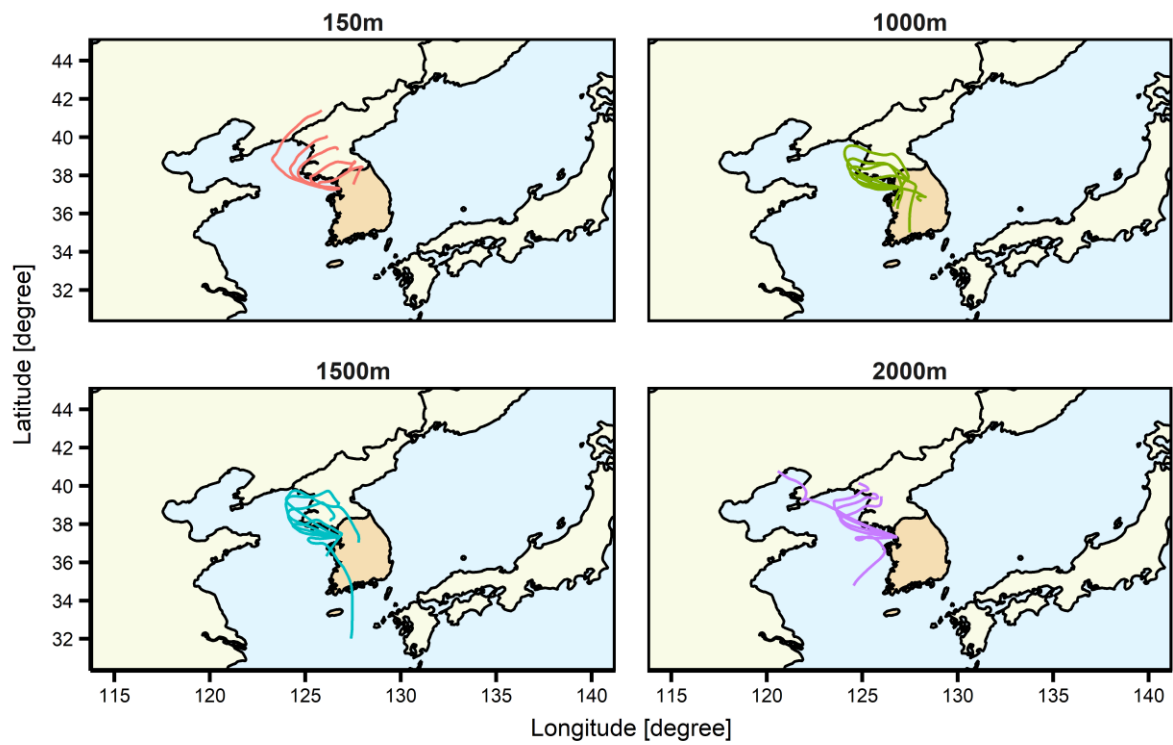

Figure S7. Backward air trajectories for Cluster 5 estimated at the arriving altitudes of 150m, 1000m, 1500m, and 2000m.

Table S10. PM<sub>2.5</sub> and O<sub>3</sub> concentrations measured by UAV for the five cluster types.

| Pollutant                                 | Altitude (m)       | Cluster 1 | Cluster 2 | Cluster 3 | Cluster 4 | Cluster 5 |
|-------------------------------------------|--------------------|-----------|-----------|-----------|-----------|-----------|
| PM <sub>2.5</sub><br>(µg/m <sup>3</sup> ) | 30                 | 21.8      | 13.5      | 7.8       | 3.5       | 12.3      |
|                                           | 60                 | 22.0      | 14.3      | 7.7       | 2.6       | 12.5      |
|                                           | 90                 | 21.9      | 15.5      | 8.9       | 2.2       | 12.7      |
|                                           | 120                | 22.6      | 16.2      | 7.8       | 2.1       | 13.1      |
|                                           | 145                | 22.8      | 16.5      | 8.8       | 2.2       | 13.3      |
|                                           | Average            | 22.2      | 15.2      | 8.2       | 2.5       | 12.8      |
|                                           | Standard deviation | 0.4       | 1.3       | 0.6       | 0.6       | 0.4       |
| O <sub>3</sub><br>(ppm)                   | 30                 | 0.029     | 0.026     | 0.018     | 0.024     | 0.017     |
|                                           | 60                 | 0.029     | 0.040     | 0.025     | 0.024     | 0.019     |
|                                           | 90                 | 0.031     | 0.046     | 0.026     | 0.042     | 0.019     |
|                                           | 120                | 0.034     | 0.042     | 0.024     | 0.032     | 0.022     |
|                                           | 145                | 0.033     | 0.048     | 0.024     | 0.037     | 0.020     |
|                                           | Average            | 0.031     | 0.040     | 0.024     | 0.032     | 0.019     |
|                                           | Standard deviation | 0.002     | 0.009     | 0.003     | 0.008     | 0.002     |
